# Supplementary material for: Meta-analysis of differences in Constant-Murley scores for three mid-shaft clavicular fracture treatments
Source: PubMed Central journal article supplement (PMC5669965; doi:10.18632/oncotarget.18456), 2017-06-12
Supplement: oncotarget-08-83251-s001.pdf [file oncotarget-08-83251-s001.pdf]

# Meta-analysis of differences in Constant-Murley scores for three mid-shaft clavicular fracture treatments

## Supplementary Materials

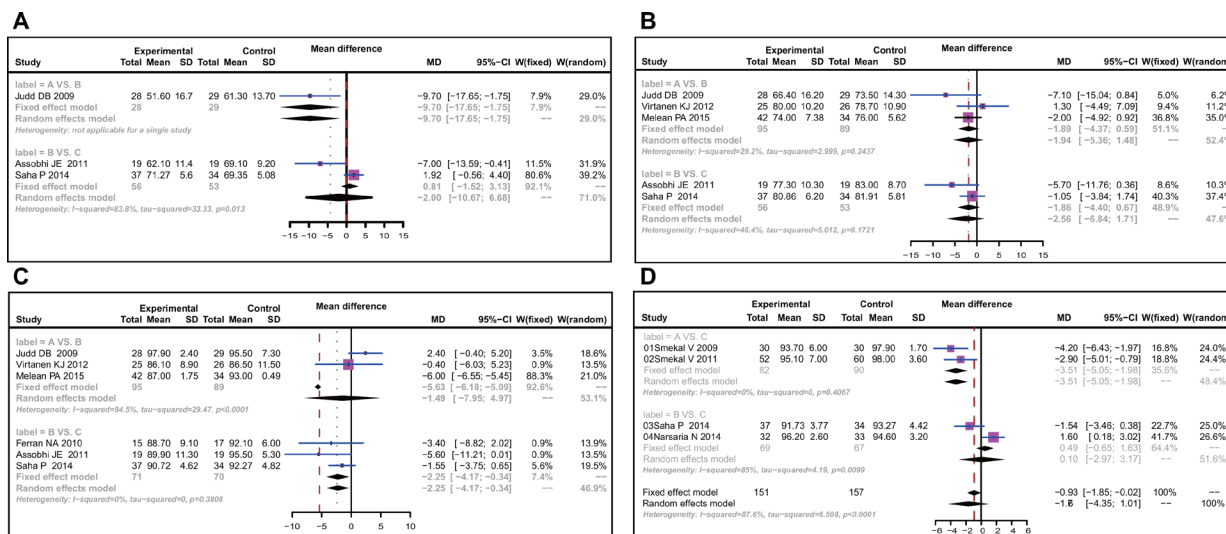

Supplementary Figure 1: Forest plots comparing the efficacy of three treatments in patients with clavicle fracture in terms of CMS follow-up time. The follow-up times were six weeks, three months, 12 months and 24 months. (A) Non-operative treatment. (B) Plate fixation. (C) intramedullary pin fixation. CMS, Constant-Murley Score.

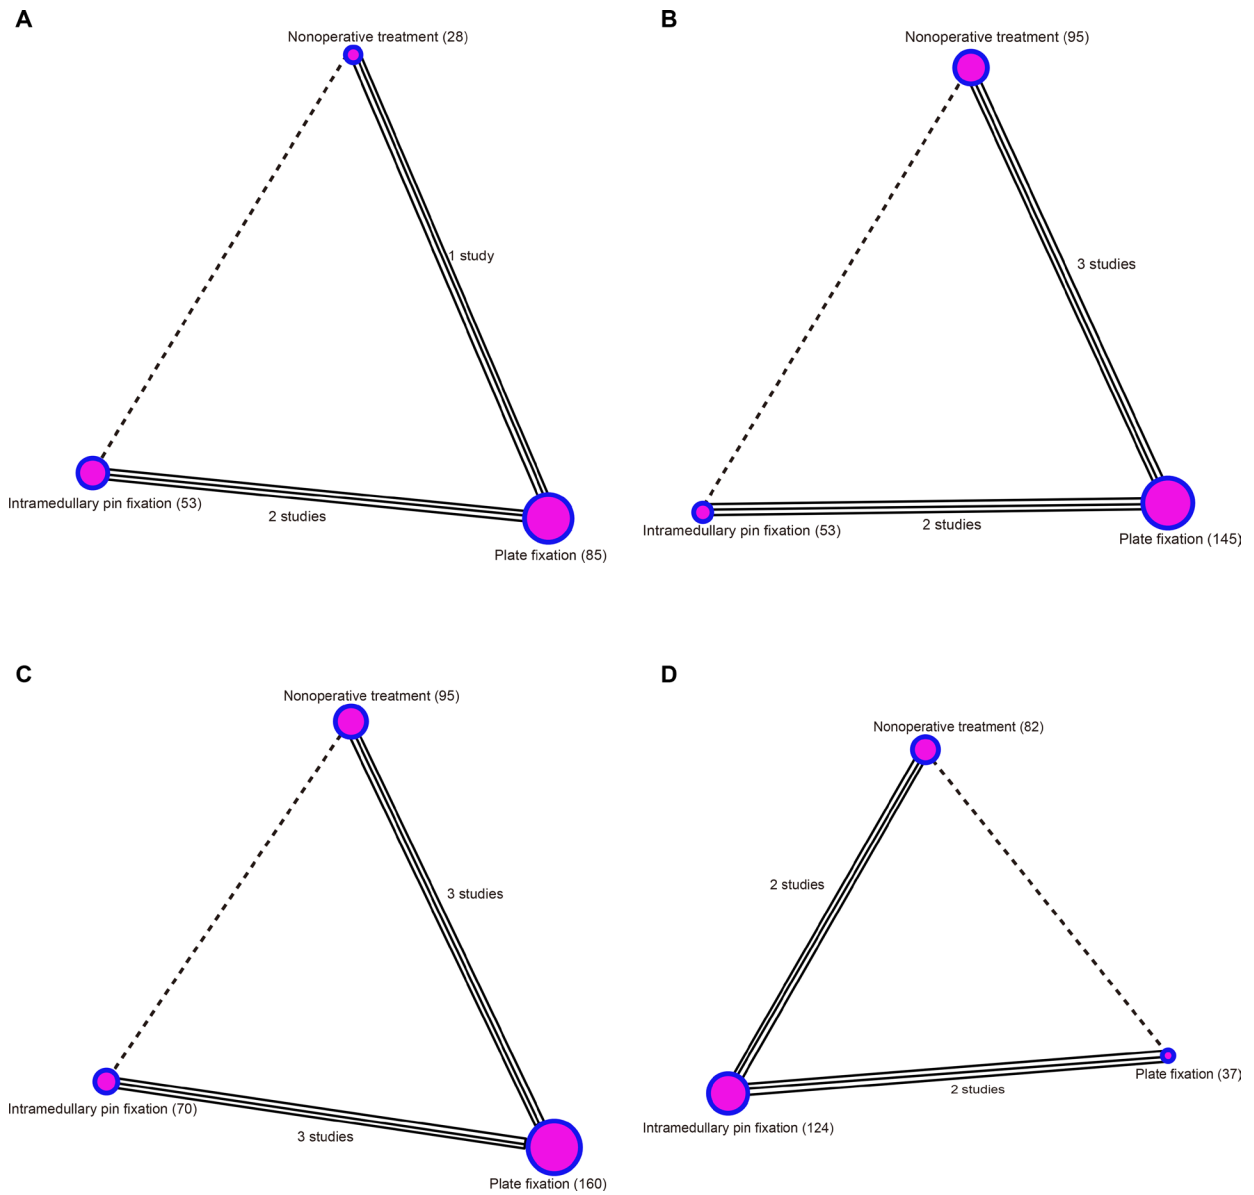

**Supplementary Figure 2: Network diagram comparing the efficacy of three treatments in patients with clavicle fracture in terms of CMS follow-up time.** The follow-up times were six weeks, three months, 12 months and 24 months. CMS, Constant-Murley Score.

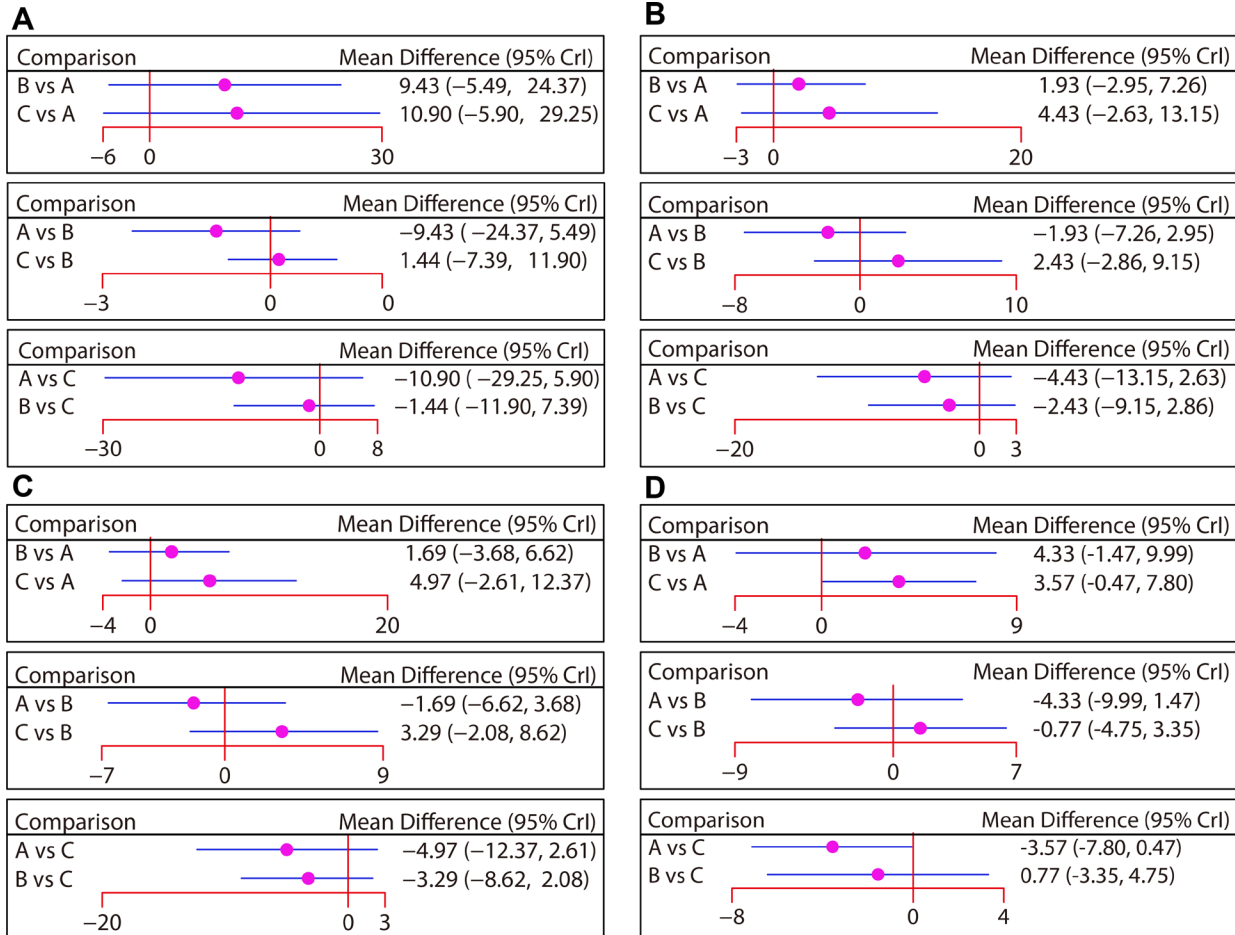

**Supplementary Figure 3: Forest plots of the relationships between efficacy comparisons for three treatments in patients with clavicle fracture in terms of CMS follow-up time.** The follow-up times were six weeks, three months, 12 months and 24 months. (A) Non-operative treatment. (B) Plate fixation. (C) intramedullary pin fixation. CMS, Constant-Murley Score.
